# Supplementary material for: Structural and genetic convergence of HIV-1 neutralizing antibodies in vaccinated non-human primates
Source: PubMed Central journal article supplement (PMC8216552; doi:10.1371/journal.ppat.1009624), 2021-06-04
Supplement: ppat.1009624.s001.pdf [file ppat.1009624.s001.pdf]

S1 Table. Crystallographic Data Collection and Refinement Statistics

|                                          | DH840.1 Fab                                   | DH846.1 Fab      |
|------------------------------------------|-----------------------------------------------|------------------|
| PDB ID                                   | 6U6M                                          | 6U6O             |
| <b>Data collection</b>                   |                                               |                  |
| Space group                              | P2 <sub>1</sub> 2 <sub>1</sub> 2 <sub>1</sub> | P2 <sub>1</sub>  |
| Cell dimensions                          |                                               |                  |
| a,b,c (Å)                                | 66.1, 75.1, 93.1                              | 71.0, 37.0, 87.9 |
| $\alpha,\beta,\gamma$ (°)                | 90.0, 90.0, 90.0                              | 90, 1, 112.0, 90 |
| Resolution (Å)                           | 50.0-2.7                                      | 50.0-2.8         |
| R <sub>sym</sub>                         | 20.0 (78.0)                                   | 22.8 (75.7)      |
| I / $\sigma$ I                           | 12.0 (3.6)                                    | 5.23 (1.6)       |
| Reflections (tot/uni)                    | 55,076/12,547                                 | 25,135/9,288     |
| Completeness (%)                         | 93.0 (87.98)                                  | 84.5 (81.5)      |
| Redundancy                               | 4.4 (3.6)                                     | 2.7 (2.6)        |
| CC(1/2)                                  | 0.99 (0.80)                                   | 0.95 (0.60)      |
| R <sub>pim</sub>                         | 8.4 (36.8)                                    | 13.0 (43.7)      |
| <b>Refinement</b>                        |                                               |                  |
| Resolution (Å)                           | 50.0-2.7                                      | 50.0-2.8         |
| No. reflections                          | 12,545                                        | 9,070            |
| R <sub>work</sub> / R <sub>free</sub> *  | 21.9/28.6                                     | 21.3/27.01       |
| Ramachandran<br>favored/allowed/outliers | 96.0/3.8/0.2                                  | 94.8/5.2/0       |
| B-Factor                                 |                                               |                  |
| Protein/ion/water                        | 37.9/-/34.8                                   | 50.6/-/37.2      |
| R.m.s deviations                         |                                               |                  |
| Bond lengths (Å)                         | 0.002                                         | 0.003            |
| Bond angles (°)                          | 0.57                                          | 0.66             |

Values in parentheses are for highest-resolution shells.

\* R<sub>free</sub> was calculated using ~5% randomly selected reflections.
