# Supplementary material for: Structural and genetic convergence of HIV-1 neutralizing antibodies in vaccinated non-human primates
Source: PubMed Central journal article supplement (PMC8216552; doi:10.1371/journal.ppat.1009624), 2021-06-04
Supplement: ppat.1009624.s007.pdf [file ppat.1009624.s007.pdf]

## A VH Gene Usage

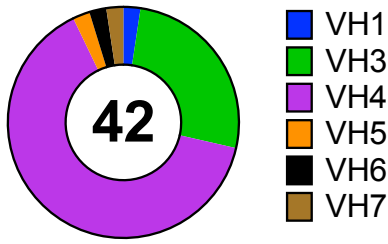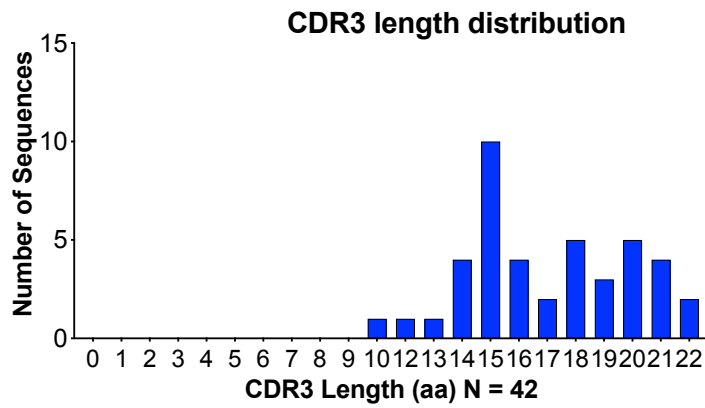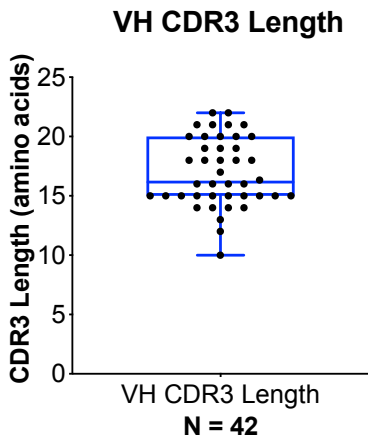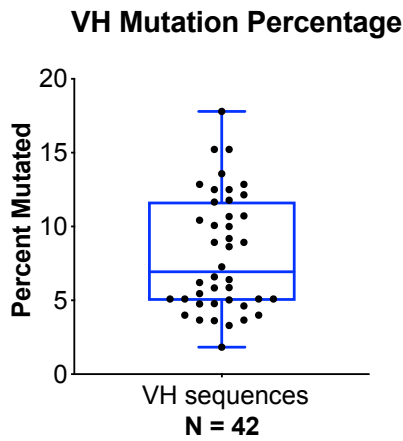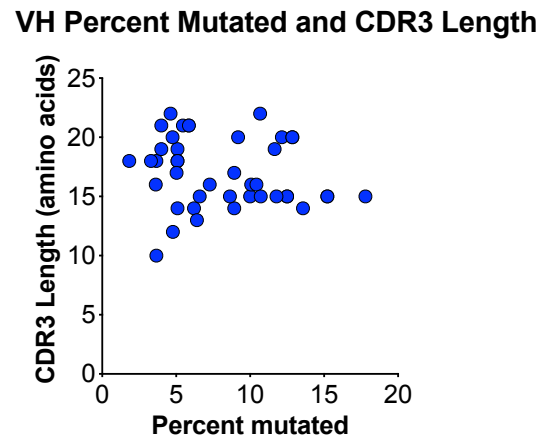

## B VL Gene Usage

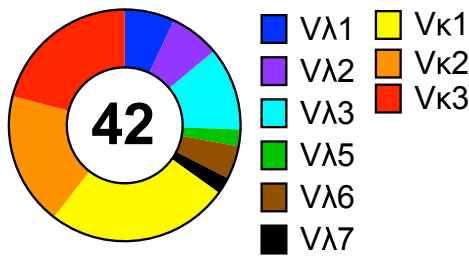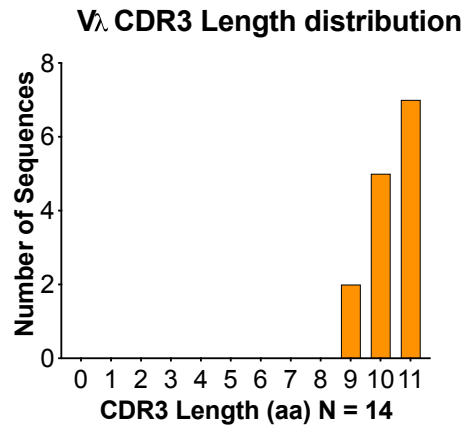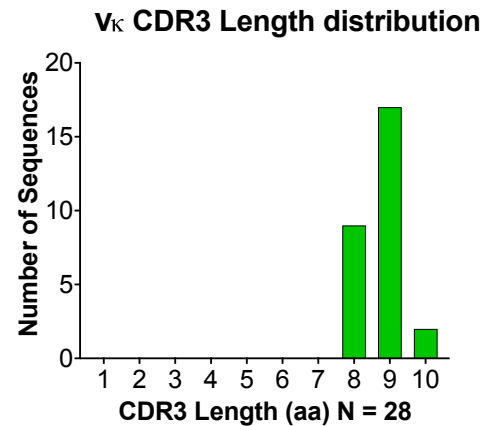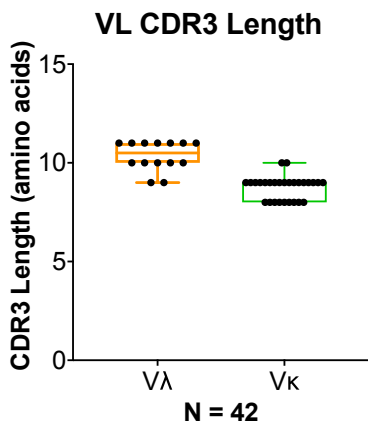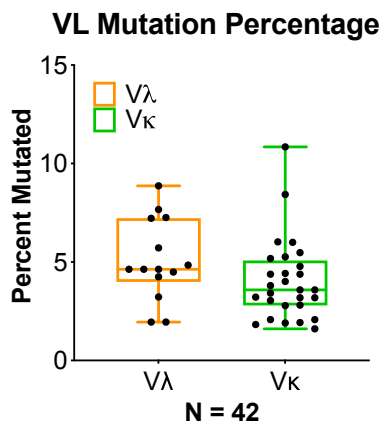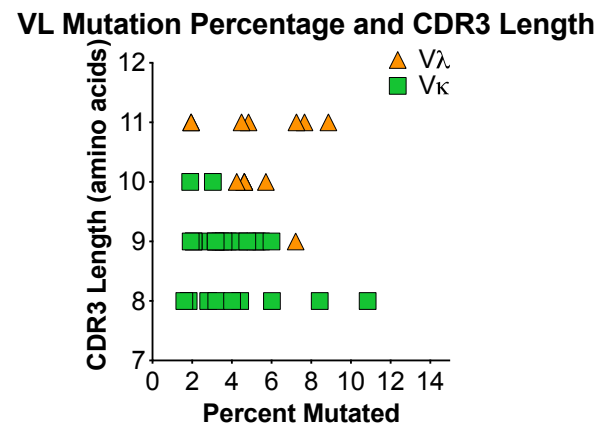

**S6 Fig. Immunogenetic analysis of monoclonal antibody sequences isolated from macaque 80-12 post vaccination.** DH845 and DH846 lineage antibodies were among the antibodies isolated from 80-12. Variable gene segment usage, CDR3 lengths, and mutation percentages are shown for the (A) heavy (blue), (B) lambda (orange), and (B) kappa (green) chains.
