# Supplementary material for: Structural and genetic convergence of HIV-1 neutralizing antibodies in vaccinated non-human primates
Source: PubMed Central journal article supplement (PMC8216552; doi:10.1371/journal.ppat.1009624), 2021-06-04
Supplement: ppat.1009624.s008.pdf [file ppat.1009624.s008.pdf]

**A**

| Immunogenetics determined by IMGT rhesus macaque library              |         |          |              |            |                   |            |            |                   |
|-----------------------------------------------------------------------|---------|----------|--------------|------------|-------------------|------------|------------|-------------------|
| Vaccine                                                               | Macaque | Antibody | Macaque VH   | Macaque JH | HCDR3 length (aa) | Macaque VL | Macaque JL | HCDR3 length (aa) |
| DNA/Ad5/Protein                                                       | L999    | DH840.1  | IGHV4-2      | IGHJ4      | 15                | IGKV3S6    | IGKJ4      | 8                 |
| DNA/Ad5/Protein                                                       | M172    | DH842    | IGHV4-2      | IGHJ5      | 17                | IGLV5-11   | IGLJ1      | 9                 |
| NYVAC-gp120                                                           | 80-12   | DH845.1  | IGHV4-2      | IGHJ1      | 20                | IGKV1S10   | IGKJ2      | 9                 |
| NYVAC-gp120                                                           | 80-12   | DH846.1  | IGHV4-2      | IGHJ4      | 15                | IGKV3S6    | IGKJ1      | 8                 |
| Immunogenetics determined by Clonanalyst rhesus macaque library v2018 |         |          |              |            |                   |            |            |                   |
| Vaccine                                                               | Macaque | Antibody | Macaque VH   | Macaque JH | HCDR3 length (aa) | Macaque VL | Macaque JL | HCDR3 length (aa) |
| DNA/Ad5/Protein                                                       | L999    | DH840.1  | IGHV4-n      | IGHJ4      | 15                | IGKV3-d    | IGKJ4-1    | 8                 |
| DNA/Ad5/Protein                                                       | M172    | DH842    | IGHV4-n      | IGHJ5-1    | 17                | IGLV5-e    | IGLJ1      | 9                 |
| NYVAC-gp120                                                           | 80-12   | DH845.1  | IGHV4-n      | IGHJ1      | 20                | IGKV1-Ab   | IGKJ2-1    | 9                 |
| NYVAC-gp120                                                           | 80-12   | DH846.1  | IGHV4-n or e | IGHJ4      | 15                | IGKV3-d    | IGKJ1-1    | 8                 |
| Immunogenetics determined by Clonanalyst rhesus macaque library v2017 |         |          |              |            |                   |            |            |                   |
| Vaccine                                                               | Macaque | Antibody | Macaque VH   | Macaque JH | HCDR3 length (aa) | Macaque VL | Macaque JL | HCDR3 length (aa) |
| DNA/Ad5/Protein                                                       | L999    | DH840.1  | IGHV4-p      | IGHJ4      | 15                | IGKV3-d    | IGKJ4-1    | 8                 |
| DNA/Ad5/Protein                                                       | M172    | DH842    | IGHV4-p      | IGHJ5-1    | 17                | IGLV5-e    | IGLJ1      | 9                 |
| NYVAC-gp120                                                           | 80-12   | DH845.1  | IGHV4-p      | IGHJ1      | 20                | IGKV1-Ab   | IGKJ2-1    | 9                 |
| NYVAC-gp120                                                           | 80-12   | DH846.1  | IGHV4-p      | IGHJ4      | 15                | IGKV3-d    | IGKJ1-1    | 8                 |

**B**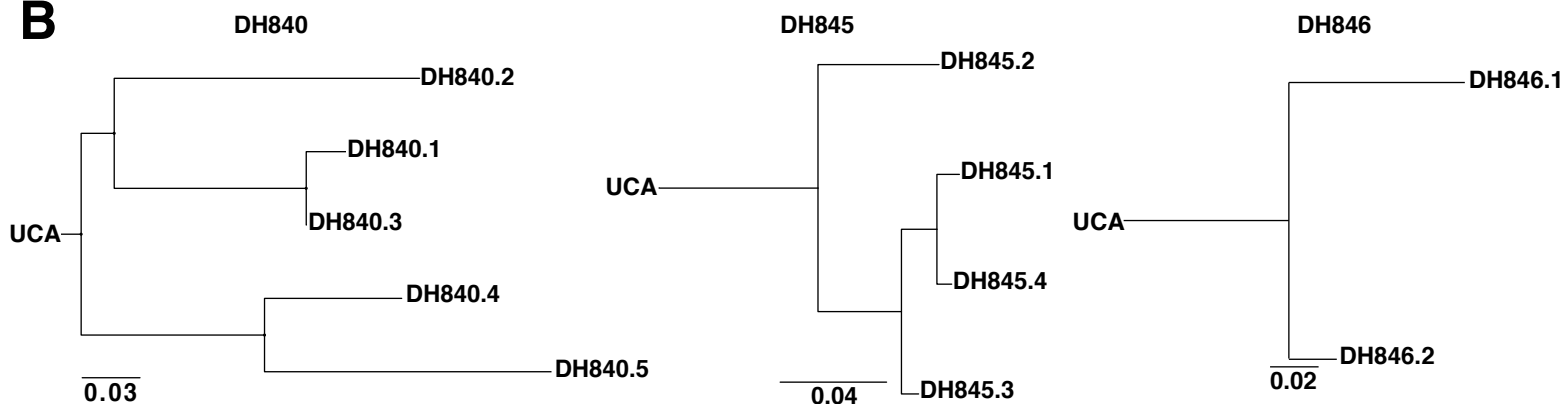**C**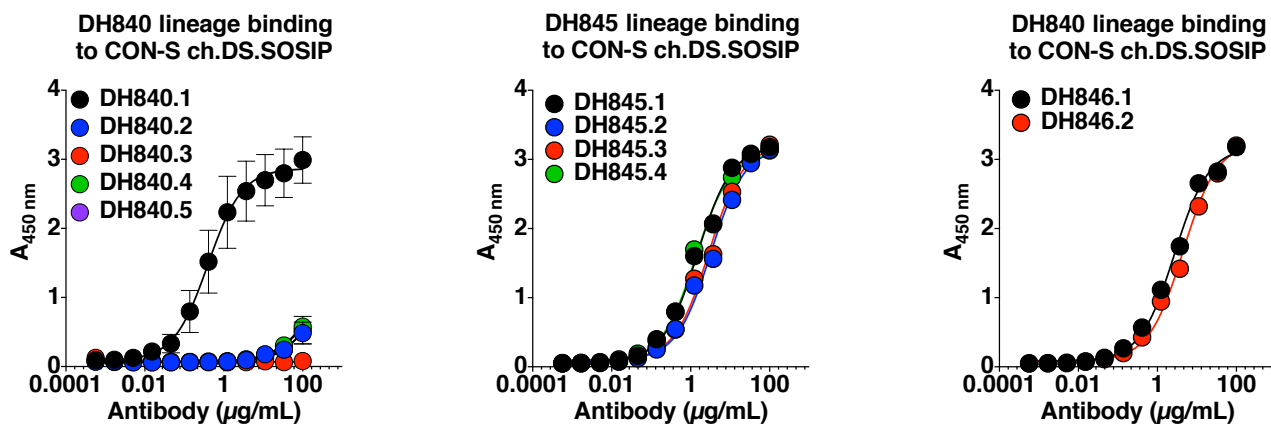

**S7 Fig. Clonal analysis of rhesus macaque CON-S neutralizing antibodies.** (A) Inference of CON-S neutralizing antibody immunogenetics using different reference gene libraries. Rhesus macaque germline gene usage, and CDR3 lengths were inferred using the rhesus library from IMGT V-QUEST and Clonanalyst with two different versions of a rhesus macaque library. (B) Phylogenetic trees of DH840, DH845, and DH848 lineages. DH842 was the only antibody isolated from its lineage. DH840.1 was isolated as a natural heavy chain paired with a light chain from a single B cell. DH840.2-DH840.5 are heavy chain sequences isolated from VH next-generation sequencing. Clonal lineages were inferred with Clonanalyst software and drawn with FigTree. (C) Antibody binding titers to CON-S envelope trimers by members of each antibody lineage. Binding titer was measured by ELISA, and is shown as the area-under-the-log-transformed curve (log AUC). Values represent the mean and standard error of 3-6 independent experiments.
