# Supplementary material for: Structural and genetic convergence of HIV-1 neutralizing antibodies in vaccinated non-human primates
Source: PubMed Central journal article supplement (PMC8216552; doi:10.1371/journal.ppat.1009624), 2021-06-04
Supplement: ppat.1009624.s009.pdf [file ppat.1009624.s009.pdf]

**A**

|            |            |             |            |            |            |     |
|------------|------------|-------------|------------|------------|------------|-----|
| DH840.H_UC | QVQLQESGPG | LVKPSSETLSL | TCAVSGYSIS | SG.YGWSWIR | QPPGKGLEWI | 50  |
| DH840.1H   | ....K..... | ..R.....    | .....T..N  | .A..A.G.V. | L.....     |     |
| DH840.2H   | .....      | .....       | ..D...G... | GDY.Y.N... | .....      |     |
| DH840.5H   | ..H.....   | ...S..N.T.  | I.S....PL. | ...L.....  | .A..R..... |     |
|            |            |             |            |            |            |     |
| DH840.H_UC | GYIGGSSGST | NYNPSLKSRV  | TISKDTSKNQ | FSLKLSSVTA | ADTAVYYCAR | 100 |
| DH840.1H   | MTVYT.T.N. | YSD.....    | .....      | ...R.....V | E.....F... |     |
| DH840.2H   | .FL.TYR.TA | S.S...R...  | .F.R.....  | .....T.... | .....      |     |
| DH840.5H   | .....T.HTA | ....P.....  | I.....F... | ...T.K...T | ....M....A |     |
|            |            |             |            |            |            |     |
| DH840.H_UC | ADGYSSGWSY | FDYWGQGLV   | TVSS       | 124        |            |     |
| DH840.1H   | ...SD...PH | ..N....L..  | ....       |            |            |     |
| DH840.2H   | E..DDYANR. | .....       | S...       |            |            |     |
| DH840.5H   | .YY.D..R.. | ..G..P....  | ..F.       |            |            |     |

**B**

|            |            |            |            |            |            |     |
|------------|------------|------------|------------|------------|------------|-----|
| DH842.H_UC | QVQLQESGPG | VVKPSETLSL | TCAVSGGSIS | SGYYYWSWIR | QPPGKGLEWI | 50  |
| DH842.H    | QV.....    | LMQ.A..... | .....RD..G | ....A.G.F. | .V.....    |     |
|            |            |            |            |            |            |     |
| DH842.H_UC | GGIYSNSEST | NYNPSLKSRV | TISKDTSKNQ | FSLKLSSVTA | ADTAVYYCAR | 100 |
| DH842.H    | VT..TSTGNI | YDESP..... | ...R.....  | .....T...P | .....F...  |     |
|            |            |            |            |            |            |     |
| DH842.H_UC | EGCSSTYCSA | GWFDVWGPGV | LVTVSS     | 126        |            |     |
| DH842.H    | ...NTVF... | .....L     | .....      |            |            |     |

**C**

|            |            |            |            |            |            |     |
|------------|------------|------------|------------|------------|------------|-----|
| DH845.H_UC | QVQLQESGPG | VVKPSETLSL | TCAVSGGSIS | SGYYYWSWIR | QPPGKGLEWI | 50  |
| DH845.1H   | .V.....    | L.....     | .....M.    | .V.QG.G... | .....      |     |
| DH845.2H   | .L.....    | L.....     | .....N     | .A.HG.G... | .....      |     |
| DH845.3H   | .L.....    | L.....     | .....M.    | .V.QG.G... | .....      |     |
| DH845.4H   | .V.....    | L.....     | .....L.    | .V.QG.G... | .....      |     |
|            |            |            |            |            |            |     |
| DH845.H_UC | GGIYSNSEST | NYNPSLKSRV | TISKDTSKNQ | FSLKLSSVTA | ADTAVYYCAR | 100 |
| DH845.1H   | ATT.TSTGNI | Y.....G.G  | .V.R.....  | .....A...  | .....      |     |
| DH845.2H   | VSS.TSTGN. | Y.D.....   | ...R.....  | .....      | .....      |     |
| DH845.3H   | ATT.TSTGN. | Y.D.....   | .V.R.....  | .....A...  | .....      |     |
| DH845.4H   | ATT.TSTGNI | Y.....G    | .V.R.....  | ...R..A... | .....      |     |
|            |            |            |            |            |            |     |
| DH845.H_UC | VNLGDSGYT  | GVSEYFEFWG | QGALVTVSS  | 129        |            |     |
| DH845.1H   | L.....D..  | .....D...  | .....      |            |            |     |
| DH845.2H   | .G...DA.N. | .....      | .....      |            |            |     |
| DH845.3H   | .....D..   | .....D...  | .....      |            |            |     |
| DH845.4H   | .....D..   | .....D...  | .....      |            |            |     |

**D**

|            |            |             |            |            |            |     |
|------------|------------|-------------|------------|------------|------------|-----|
| DH846.H_UC | QVQLQESGPG | LVKPSSETLSL | TCAVSGGSIS | DYYYWNWIRQ | PPGKGLEWIG | 50  |
| DH846.1H   | .L.....    | .....       | ..D...V... | SN.G.G.... | .....D..V  |     |
| DH846.2H   | .....      | .....       | .....S...  | VN.G.G.... | .....V     |     |
|            |            |             |            |            |            |     |
| DH846.H_UC | NIYGNSASTY | YNPSLKSRVT  | ISKDTSKNQF | FLKLSSVTAA | DTAVYYCARK | 100 |
| DH846.1H   | T...GTGN.. | .A...EG..A  | ....A..... | S.R.N..... | .....      |     |
| DH846.2H   | T...GTGN.. | .D.....     | ....A.T... | S.....     | .....      |     |
|            |            |             |            |            |            |     |
| DH846.H_UC | ITYSSGWYYF | DYWGQGLVLT  | VSS        | 123        |            |     |
| DH846.1H   | .....      | .....A      | ...        |            |            |     |
| DH846.2H   | .....      | .....       | ...        |            |            |     |

**S8 Fig. Amino acid alignments of heavy chain variable regions for each CON-S autologous neutralizing antibody clonal lineage.** Amino acids for (A) DH840, (B) DH842, (C) DH845, and (D) DH846 lineages are shown. Periods indicate the presence of identical amino acids at that position. UCAs were inferred with Cloanalyst using the 2017 macaque reference library.
