# Supplementary material for: Structural and genetic convergence of HIV-1 neutralizing antibodies in vaccinated non-human primates
Source: PubMed Central journal article supplement (PMC8216552; doi:10.1371/journal.ppat.1009624), 2021-06-04
Supplement: ppat.1009624.s010.pdf [file ppat.1009624.s010.pdf]

**A**

|             |            |            |            |            |            |     |
|-------------|------------|------------|------------|------------|------------|-----|
| DH840.K_UCA | EIVMTQSPAT | LSLSPGERAT | LSCRASQSVS | SRLAWYQQKP | GQAPRLLIYD | 50  |
| DH840.1L    | ..MV.....  | ..V.....   | .....R     | N.I.....   | ..S.....   |     |
| DH840.K_UCA | ASSRATGIPD | RFSGSGSGTE | FTLTISSLEP | EDVAVYFCQQ | ESNWLTFGGG | 100 |
| DH840.1L    | ..I..P.... | .L.....    | .....N.... | S.....L    | .A.....    |     |
| DH840.K_UCA | TKVEIK.... | .....      | 115        |            |            |     |
| DH840.1L    | .....      | .....      |            |            |            |     |

**B**

|             |            |            |            |            |            |     |
|-------------|------------|------------|------------|------------|------------|-----|
| DH842.L_UCA | QPVLTOPTSL | SASPGASARL | TCTLRSGISV | GSYRIFWYQQ | KPGSPPRYLL | 50  |
| DH842.L     | .A.....A.  | .....      | .....      | AD.....    | R.....     |     |
| DH842.L_UCA | NYHTSDSKHQ | GSGVPSRFSG | SKDASANAGI | LLISGLQSED | EADYYCMIWH | 100 |
| DH842.L     | ..R....H.. | .....      | ...D...T.F | .V.....    | ....H...R. |     |
| DH842.L_UCA | NNAYIFGAGT | RLTVL      | 115        |            |            |     |
| DH842.L     | .T.....G.. | ...L.      |            |            |            |     |

**C**

|             |            |            |            |            |            |     |
|-------------|------------|------------|------------|------------|------------|-----|
| DH845.K_UCA | DIQMTQSPSA | LSASVGDRVT | ISCRASQNIY | SGLAWYQQKP | GKAPKLLIYA | 50  |
| DH845.1L    | A..L.....  | .....      | .....      | .N.....    | .....FG    |     |
| DH845.2L    | A..L.....  | .....      | .....      | .S.....    | .....V.... |     |
| DH845.3L    | A..L.....  | .....      | .....      | .N.....    | .....FG    |     |
| DH845.4L    | A..L.....  | .....      | .....      | .N.....    | .....FG    |     |
| DH845.K_UCA | ASRLQSGIPS | RFSGSGSGTD | FTLTISLQP  | EDSAAYYCQQ | VYSNFYSPGQ | 100 |
| DH845.1L    | .....      | .....      | .....      | ....T....  | .....      |     |
| DH845.2L    | .....      | .....      | .....      | .....      | .....      |     |
| DH845.3L    | .....      | .....      | .....      | ....T....  | .....      |     |
| DH845.4L    | .....      | .....      | .....      | ....T....  | .....      |     |
| DH845.K_UCA | GTKVEIK... | .....      | 115        |            |            |     |
| DH845.1L    | .....      | .....      |            |            |            |     |
| DH845.2L    | .....      | .....      |            |            |            |     |
| DH845.3L    | .....      | .....      |            |            |            |     |
| DH845.4L    | .....      | .....      |            |            |            |     |

**D**

|             |            |            |            |            |            |     |
|-------------|------------|------------|------------|------------|------------|-----|
| DH846.K_UCA | EIVMTQSPAT | LSLSPGERAT | LSCRASQSVS | SRLAWYQQKP | GQAPRLLIYD | 50  |
| DH846.1L    | .....      | .....      | .....      | .....      | .....      |     |
| DH846.2L    | .....      | ...F.....  | .....      | T.....     | .....      |     |
| DH846.K_UCA | ASSRATGIPD | RFSGSGSGTE | FTLTISSLEP | EDVAVYFCQQ | ESNWSTFGQG | 100 |
| DH846.1L    | ..N.....   | .....      | .....G...  | .....E     | DH.....    |     |
| DH846.2L    | ..I.....   | .....      | .....      | ..F.....   | DN.....    |     |
| DH846.K_UCA | TKVEIK.... | .....      | 115        |            |            |     |
| DH846.1L    | .....      | .....      |            |            |            |     |
| DH846.2L    | .....      | .....      |            |            |            |     |

**S9 Fig. Amino acid alignments of light chain variable regions for each CON-S autologous neutralizing antibody clonal lineages.** Amino acids for (A) DH840, (B) DH842, (C) DH845, and (D) DH846 lineages are shown. Periods indicate the presence of identical amino acids at that position. UCAs were inferred with Cloanlyst using the 2017 macaque reference library.
