# Supplementary material for: Structural and genetic convergence of HIV-1 neutralizing antibodies in vaccinated non-human primates
Source: PubMed Central journal article supplement (PMC8216552; doi:10.1371/journal.ppat.1009624), 2021-06-04
Supplement: ppat.1009624.s012.pdf [file ppat.1009624.s012.pdf]

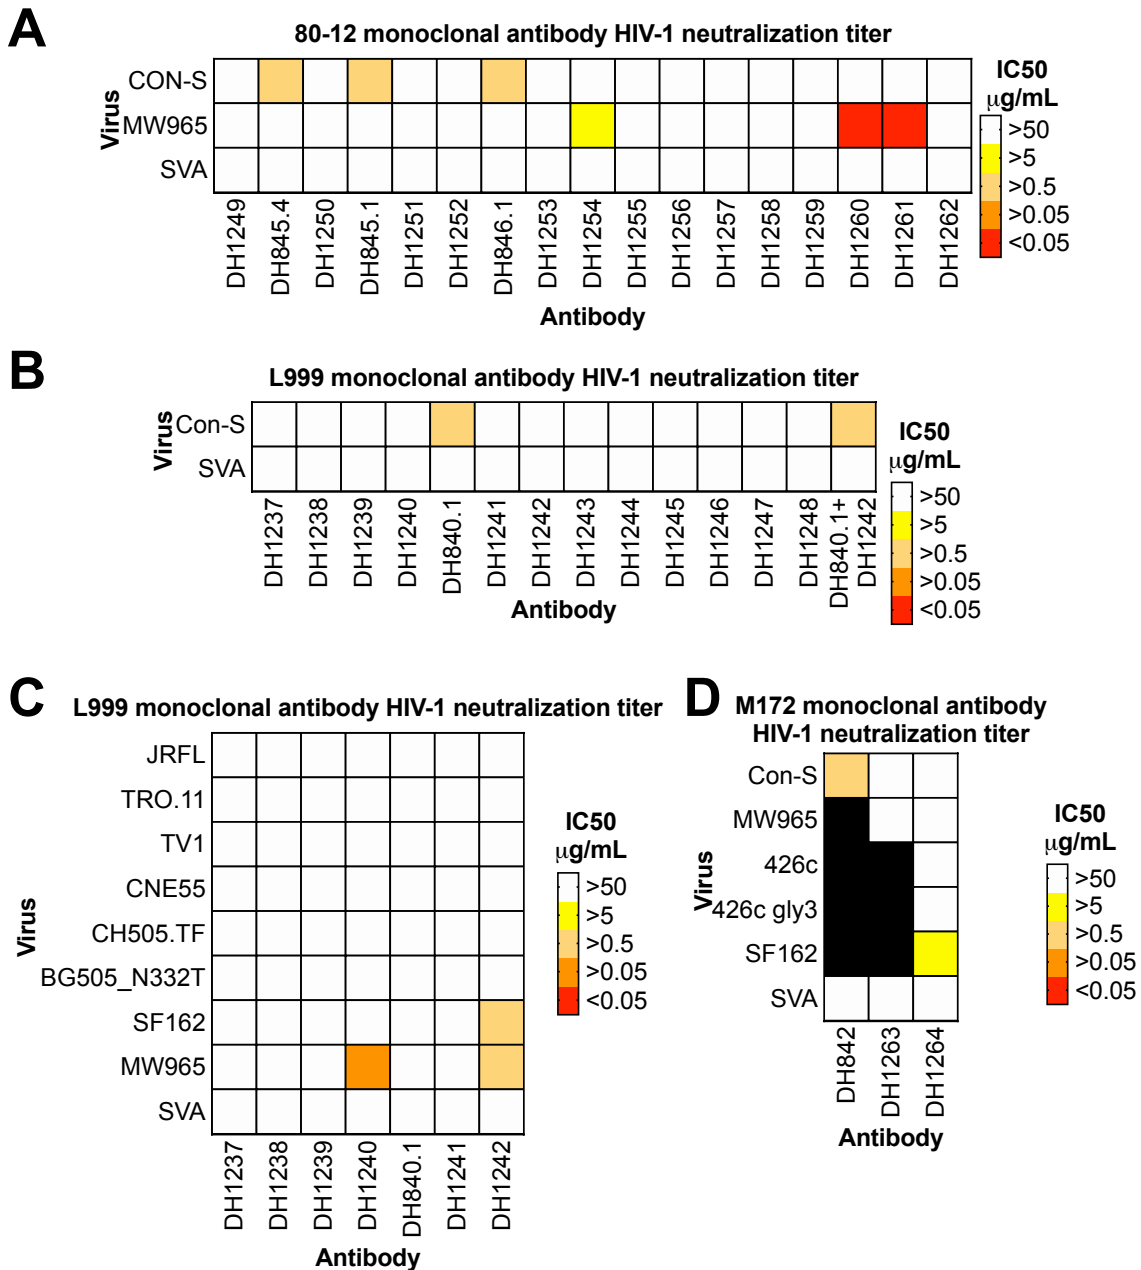

**S11 Fig. HIV-1 neutralization titers for rhesus monoclonal antibodies induced by CON-S vaccination.** Monoclonal antibodies were isolated from macaques (A) 80-12, (B, C) L999 and (D) M172. Each antibody was expressed and tested for neutralization activity against CON-S and other HIV-1 isolates. Neutralization titers are shown as the concentration of antibody that inhibits 50% of virus replication. Titters are color coded based on potency as indicated in the keys. Black squares show viruses not tested for a particular antibody.
