# Supplementary material for: Structural and genetic convergence of HIV-1 neutralizing antibodies in vaccinated non-human primates
Source: PubMed Central journal article supplement (PMC8216552; doi:10.1371/journal.ppat.1009624), 2021-06-04
Supplement: ppat.1009624.s016.pdf [file ppat.1009624.s016.pdf]

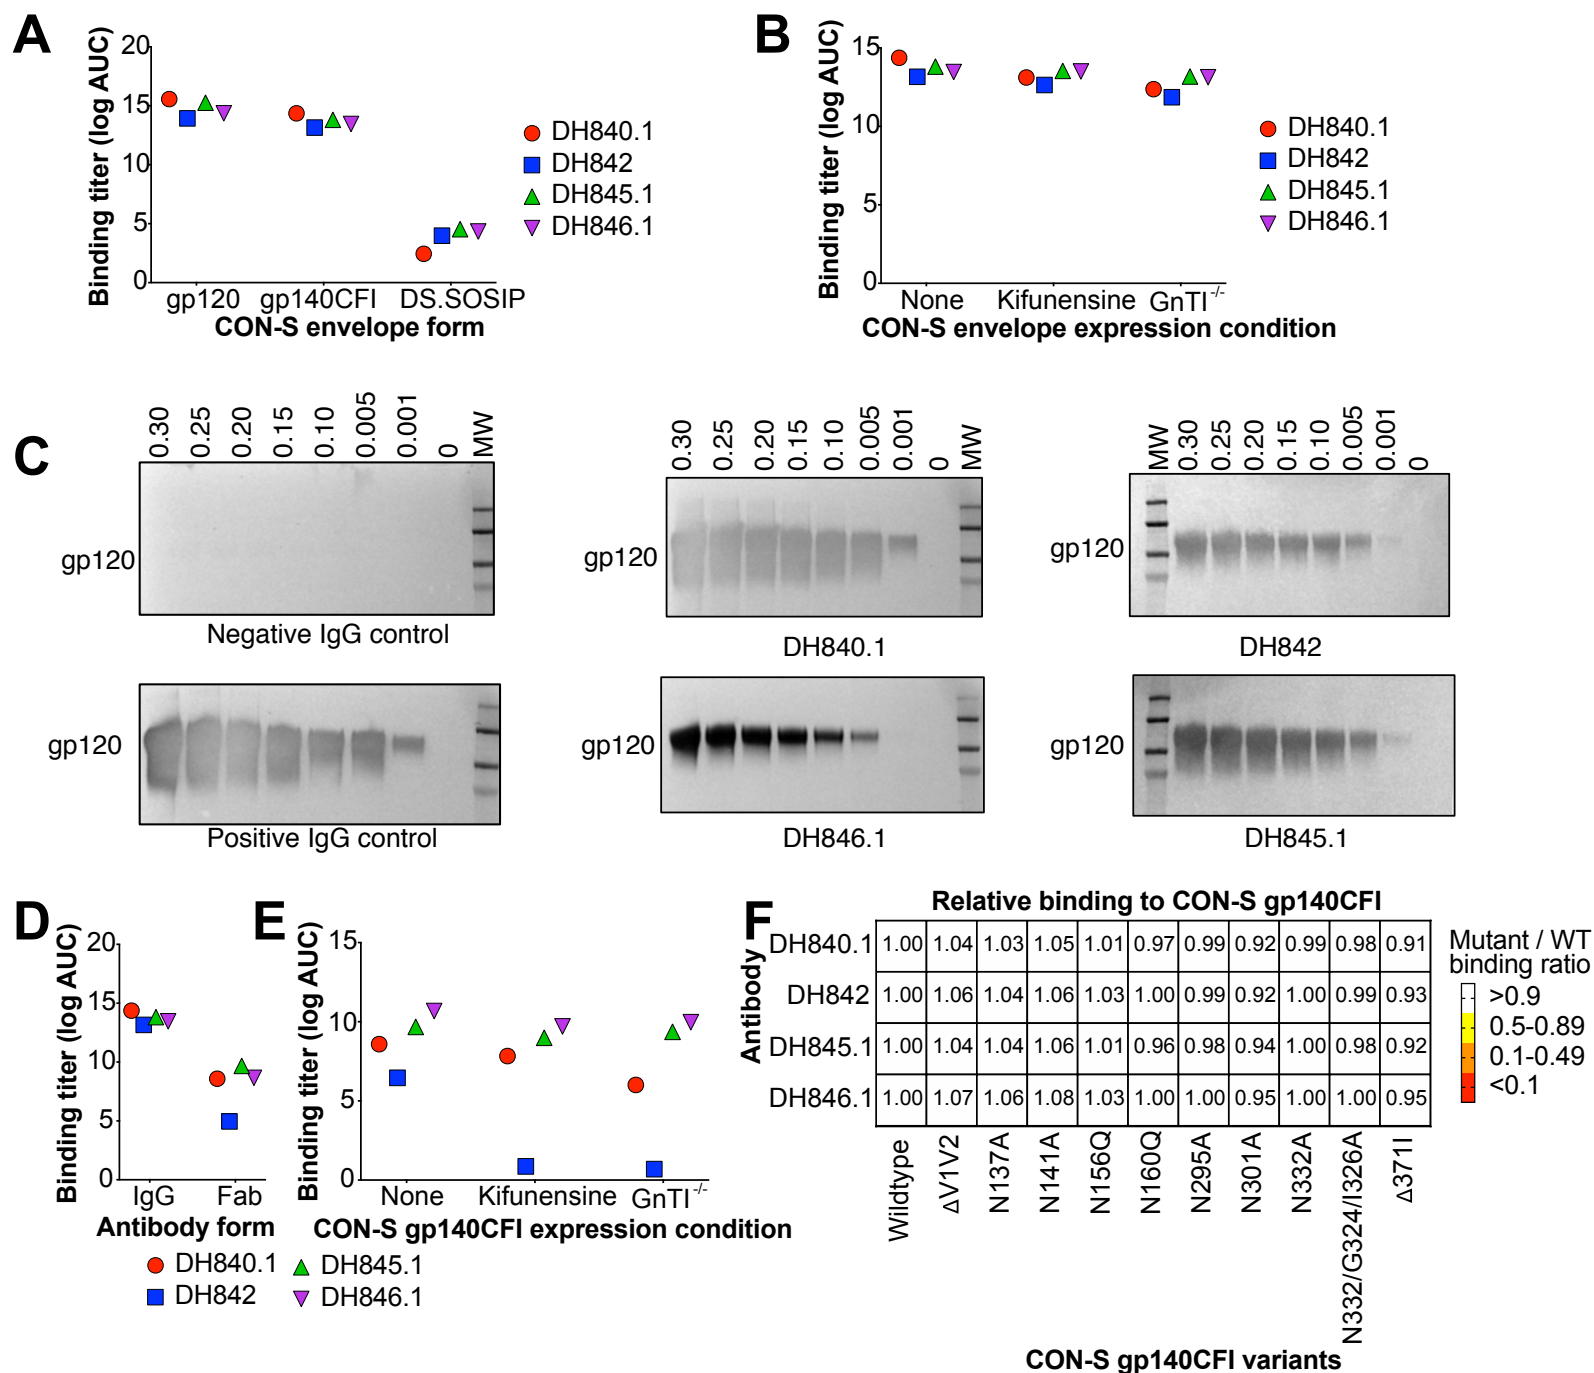

**S15 Fig. Antibody recognition of different CON-S envelope subunits and glycoforms. (A,B)**

Recombinant IgG binding titers to CON-S envelope as measured by ELISA. Glycoform variants shown in (B) are CON-S gp140CFI. Titers are shown as area under the log-transformed curve (log AUC). (C) Recombinant IgG binding to gp120 by western blot under reduced conditions. Anti-flu IgG and V3-specific antibody 19B were used as negative and positive controls respectively. (D) Comparison of IgG and Fab binding for each antibody to CON-S gp140CFI. (E) Comparison of Fab binding to different glycoforms of CON-S gp140CFI. Glycosylation of the gp140 was enriched for  $\text{Man}_9\text{GlcNAc}_2$  or  $\text{Man}_5\text{GlcNAc}_2$  glycosylation by expression in  $\text{GnTI}^{-/-}$  cells or kifunensine treatment. (F) Relative binding to CON-S gp140CFI with mutations in known bnAb sites. Binding is normalized to wild-type CON-S gp140CFI binding titer. Mean values of two independent experiments are shown in each panel.
