# Supplementary material for: Structural and genetic convergence of HIV-1 neutralizing antibodies in vaccinated non-human primates
Source: PubMed Central journal article supplement (PMC8216552; doi:10.1371/journal.ppat.1009624), 2021-06-04
Supplement: ppat.1009624.s017.pdf [file ppat.1009624.s017.pdf]

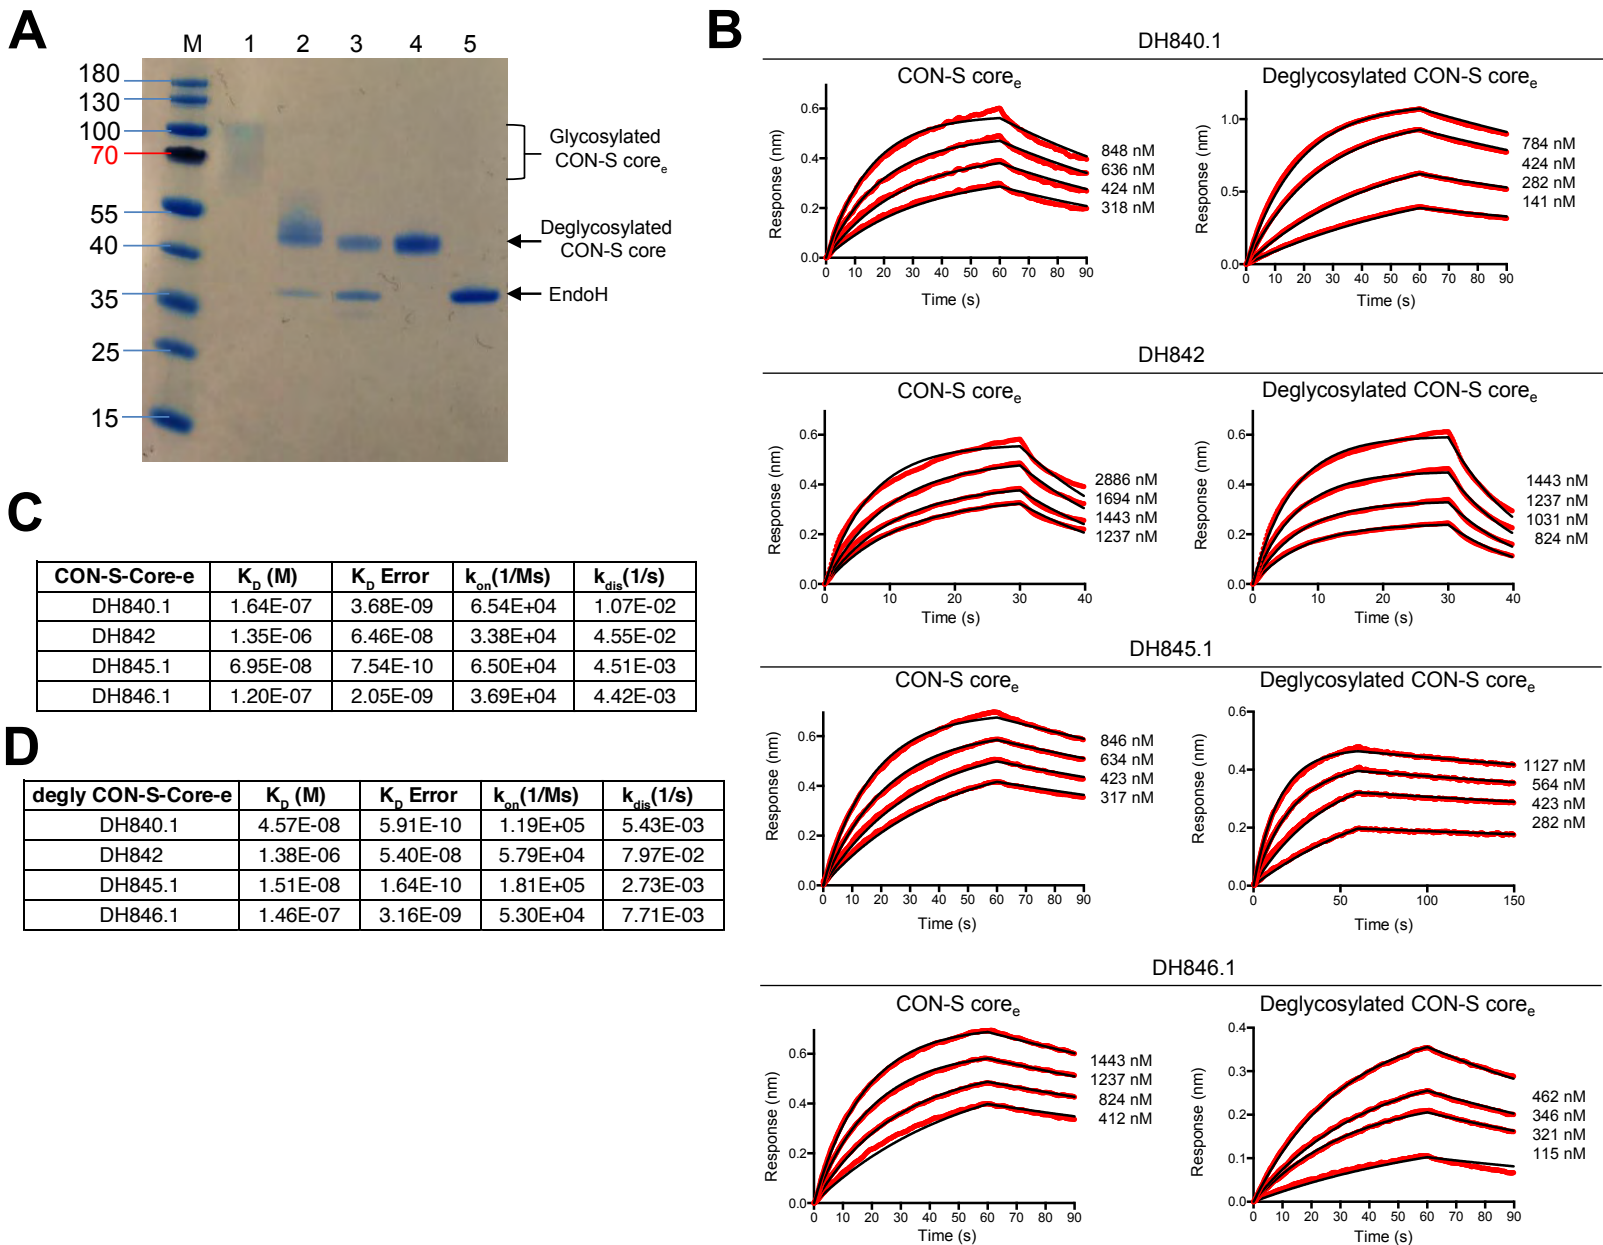

**S16 Fig. Binding kinetics of CON-S nAbs to glycosylated and deglycosylated CON-S core<sub>e</sub> measured by Biolayer Interferometry.** (A) SDS-PAGE of purified CON-S core<sub>e</sub> gp120 prior to and following EndoH-based deglycosylation. M: Protein ladder; 1: CON-S-core<sub>e</sub>; 2: CON-S-core<sub>e</sub> + EndoH; 3: CON-S-core<sub>e</sub> + EndoH following ConA-resin purification; 4: Deglycosylated CON-S-core<sub>e</sub> following size-exclusion purification; 5: EndoH following size-exclusion purification. (B) Affinity measurements of CON-S nAbs to glycosylated and deglycosylated CON-S core<sub>e</sub> gp120 as measured by Biolayer Interferometry. (C,D) CON-S autologous neutralizing antibodies binding kinetics to glycosylated and deglycosylated CON-S Core<sub>e</sub>. Values were calculated from the curves in B.
