# Supplementary material for: Structural and genetic convergence of HIV-1 neutralizing antibodies in vaccinated non-human primates
Source: PLoS Pathog. 2021 Jun 4;17(6):e1009624. doi: 10.1371/journal.ppat.1009624 (PMC8216552; doi:10.1371/journal.ppat.1009624)
Supplement: S14 Fig — (PDF) [file ppat.1009624.s015.pdf]

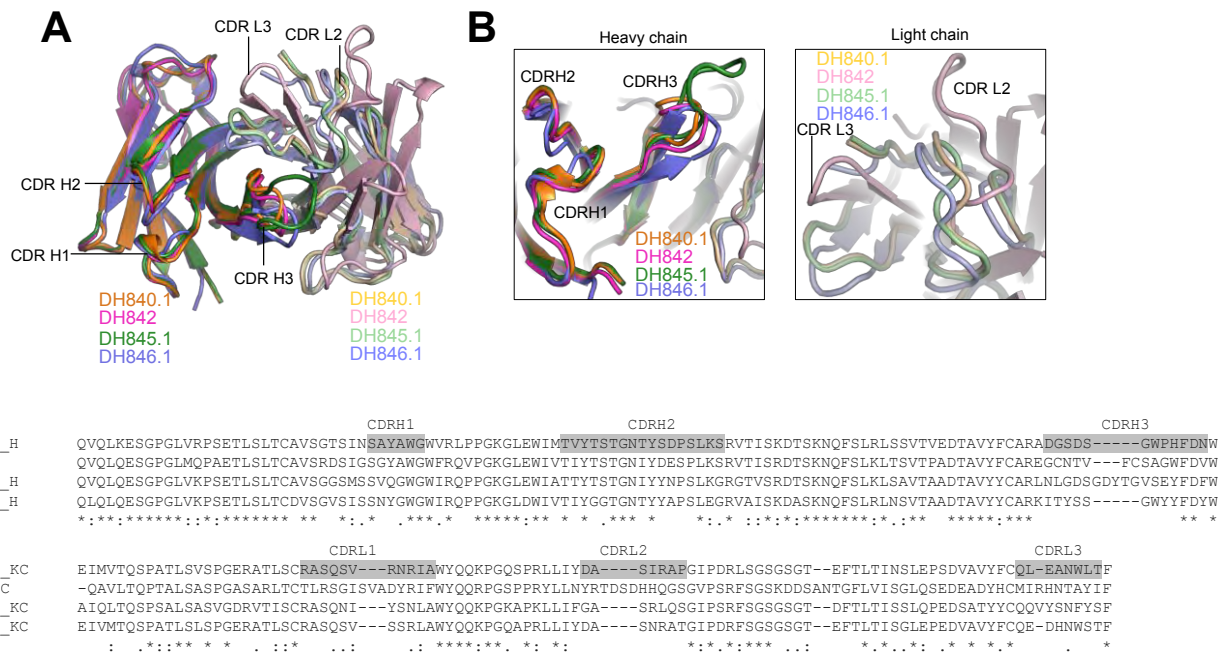

**S14 Fig. Model of DH842 and DH845 Fab molecules.** (A) Overlay of DH840.1, and DH846 crystal structures with models of DH842, and DH845 Fab molecules shown in ribbon representation. (B) Zoom-in of the heavy chain and light chain. (C) Sequence alignment of the DH840.1, DH842, DH845, and DH846 heavy and light chain sequences. CDR regions are shaded in gray.
